# Supplementary material
Source: PubMed Central journal article supplement (PMC6079557)
Supplement: mmc1.pdf [file mmc1.pdf]

YMTHE, Volume 26

## **Supplemental Information**

### **Neonatal Systemic AAV-Mediated Gene Delivery of GDF11 Inhibits Skeletal Muscle Growth**

**Quan Jin, Chunging Qiao, Jianbin Li, Juan Li, and Xiao Xiao**

**hGDF11**

5' -

atggtgctggctgccccctgctgctgggatttctgctgctggctctggaactgcgccctagaggcgaagccgctga  
aggaccagctgcccgtgctgctgctgcccagcccgccgagctgcagcaggcgtgggcgaggagaagaagctctagacctg  
cccctagcgtggccccctgagcctgatggatgtcctgtgtgctgtggcgccagcactccagagagctgcccgtggaa  
tccatcaagagccagatcctgagcaagctgagactgaaagaggcccccaacatcagccgcgaggtcgtgaaacagct  
gctgccccaaagccccccccactgcagcagattctggacctgcacgacttccagggggagccctgcagcccagaggatt  
tcttggaaagaggacgagtagaccgcccaccaccgagacagtgatcagcatggcccaggaaaccgacccccgcccgtgcag  
acagatggcagccctctgtgctgcccacttccacttccagccccaaagtgatgttcaccaaggtgctgaaagcccagct  
gtgggtgtacctgagggcccgtgcccagaccaccgtgtacctgcagatcctgcccgtgaagcctctgaccggcg  
agggaaacagctggcgggcgaggggggagggaagaaggcacatcagaatcagaagcctgaagatcgagctgcacagcaga  
agcggccactggcagagcactcgacttcaaacaggtgctgcactcctgggtccggcagccccagagcaattggggcact  
cgagatcaacgccttcgacccccagcggcaccgatctggcgtgacatctctgggacctggcgccgaaggcctgcacc  
ccttcatggaactgagagtgtggtgaaaacaccaagcggagcggcggaacctgggctggattgtgatgagcagc  
agcgagagccggtgctgcagataccccctgaccgtggacttccagggcctttggctgggactggatcattgccccaa  
gcggtacaaggccaactactgcagcggccagtgcgagtagatgttcatgcagaagtacccccacaccacctggtgc  
agcaggccaatcctagaggctctgcccggccttctgctgcacccccacaaagatgagccccatcaacatgctgtacttc  
aacgacaagcagcagatcatctacggcaagatccccggcattggtggtggacagatgcccgtgctcc-3'

**hGDF11Pro-Fc-1**

5' -

gagctcaagcttaagctaacaagaccacgacgatatcacggctcgtgggtctcaaagaacaacaacaacaagtcgg  
actgagaaggagccaccatgggtgctggctgctcctctgctgctgggattcctgctgctggccctggaactgaggcct  
agaggcgaagccgctgaaggacctgctgcccgtgcccagcccgctgcagcagcagctgcaggcgttggcgaggaga  
gagatctagcagacctgcccccttctgtggccccctgagcctgatggctgtcctgtgtgtgtgtggcggcagcagca  
gagagctgcccgtggaatccatcaagagccagatcctgagcaagctgagactgaaagaggccccctaacatcagcaga  
gaggtggtcaagcagctgctgcccagggccccctccactgcagcagatcctggacctgcagatttccagggcgacgc  
tctgcagccccgaggacttccctggaagaggatgagtaccacgcccaccaccgagacagtgatcagcatggcccagaga  
cagacccccgcccgtgcagacagatggcagccctctgtgctgcccacttccacttccagccccaaagtgatgttcaccaag  
gtgctgaaggcccagctgtgggtgtacctgaggcctgtgcccagaccgcccaccgctgtatctgcagatcctgcccgt  
gaagcctctgaccggcgagggaacagctgggtggcggtggcgaggacggcgccacatcagaatcagaagcctgaaga  
tcgagctgcaactccagaagcggccactggcagagcactcgacttcaaacaggtgctgcacagctgggtccggcagccc  
cagagcaactggggcactcgagatcaacgccttcgacccccagcggcaccgatctggccgttacatctctgggacctgg  
cgccgagggcctgcateccctttatggaactgcccgtgctggaaaacaccaaggacaagaccacacctgtcctcct  
gcccctgcccctgaaactgctgggcccagcctagcgtgttccctgttcccacccaagcccaggacacctgatgatcagc  
cggacccccctgaagtgcacctgcccgtgggtggcagctgtcccacgaggatcccgaagtgaagttcaattgggtacgtgga  
cggcgtggaagtgacacaacgccaagaccaagcccagagaggaaacagtacaacagcacctaccgggtgggtgtccgtgc  
tgaccgtgctgcaccaggactggctgaaacggcaaagagtacaagtgaagggtgtccaacaaggccctgcccctgcccc  
atcgagaaaaccatcagcaaggccaagggccagccccgcgagcctcaggtttacacactgcctcccagccgggaaga  
gatgaccaagaaccaggtgtccctgacatgcctgggtcaagggcttctaccccagcgatctgcccgtggaatgggaga  
gcaacggccagcctgagaacaactacaagaccacccctcccgtgctggacagcagcggctcattcttccctgtacagc  
aagctgaccgtggacaagagccggtggcagcagggcaacgtgttcagctgctctgtgatgcacgaggccctgcacaa  
ccactacaccagaagtcctgtcctgagccccggcaagtgatgactcgaggcgccgc-3'

**Supplemental Figure 1.** Codon-optimized sequences for human GDF11 and human GDF11Pro-Fc-1.

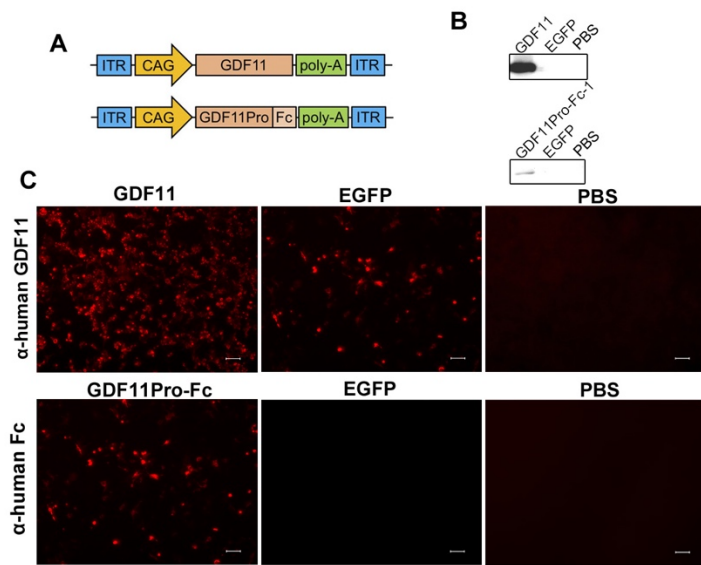

**Supplemental Figure 2.** (A) Vector construction. (B) Western blot analysis of cell lysates after vector reinfection with AAV9-GDF11 or AAV9-GDF11Pro-Fc-1 in HEK293 cells at a MOI of 10,000 vg/cell. AAV9-EGFP and PBS were used as control. (C) Representative immunofluorescence analysis confirmed the presence of the GDF11 and GDF11Pro-Fc-1 proteins after vector reinfection in HEK293 cells at a MOI of 10,000 vg/cell. 5 to 10  $\mu$ M Hoechst 33342 was co-administered into HEK293 cells to facilitate transgene expression.

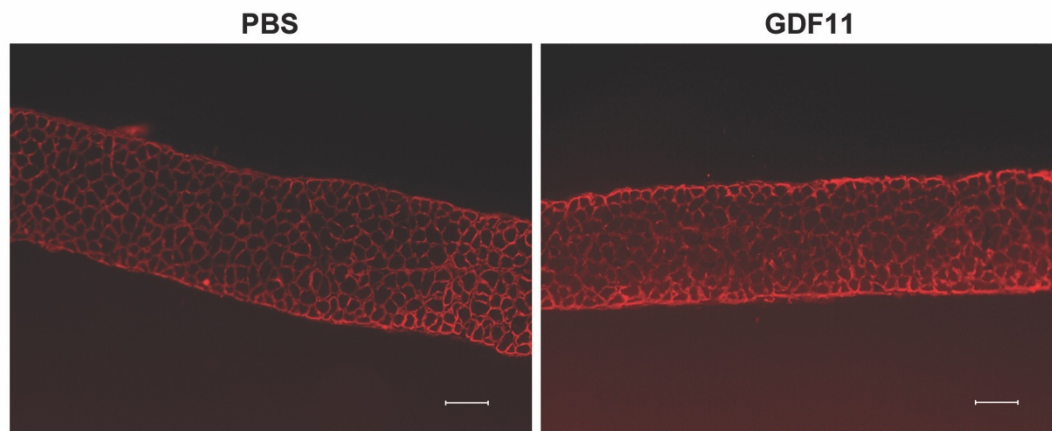

**Supplemental Figure 3.** Representative immunofluorescence sections from PBS-treated or AAV9-GDF11-treated diaphragm stained for laminin- $\alpha$ 2 to visualize myofibers. Scale bar = 100  $\mu$ m.

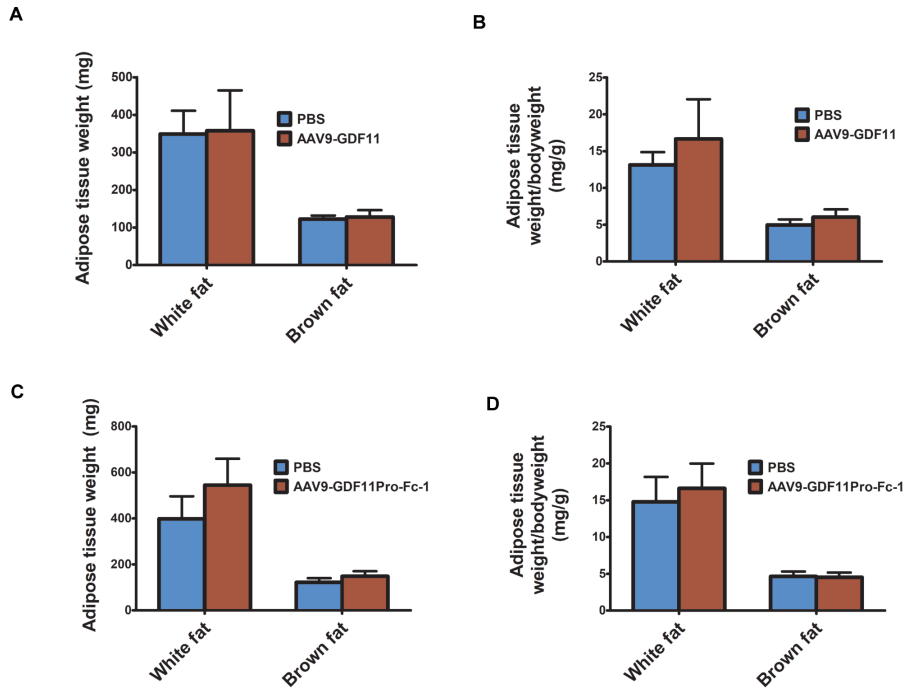

**Supplemental Figure 4.** Total and normalized mass of abdominal white fat depots and supraclavicular brown fat in mice treated with (A,B) AAV9-GDF11 or (C,D) AAV9-GDF11ProFc-1 compared to control.
